# Supplementary material for: Overexpression of cyclooxygenase-2 in adipocytes reduces fat accumulation in inguinal white adipose tissue and hepatic steatosis in high-fat fed mice
Source: PubMed Central journal article supplement (PMC6586826; doi:10.1038/s41598-019-45062-w), 2019-06-20
Supplement: 41598_2019_45062_MOESM1_ESM.pdf [file 41598_2019_45062_MOESM1_ESM.pdf]

## **SUPPLEMENTAL INFORMATION FOR**

### **Overexpression of cyclooxygenase-2 in adipocytes reduces fat accumulation in inguinal white adipose tissue and hepatic steatosis in high-fat fed mice**

Niels Banhos Danneskiold-Samsøe, Si Brask Sonne, Jeppe Madura Larsen, Ann Normann Hansen, Even Fjære, Marie Sophie Isidor, Sidsel Petersen, Jeanette Henningsen, Ilenia Severi, Loris Sartini, Yvonne Schober, Jacqueline Wolf, W. Andreas Nockher, Christian Wolfrum, Saverio Cinti, Christian Sina, Jacob Bo Hansen, Lise Madsen, Susanne Brix, Karsten Kristiansen

To whom correspondence should be addressed.

E-mail: [nds@bio.ku.dk](mailto:nds@bio.ku.dk), [lise.madsen@hi.no](mailto:lise.madsen@hi.no), [sbp@bio.dtu.dk](mailto:sbp@bio.dtu.dk), [kk@bio.ku.dk](mailto:kk@bio.ku.dk)

#### **This PDF file includes:**

- Figures S1-S7
- Supplementary methods
- Supplementary table S1-S4

**Figure S1.**

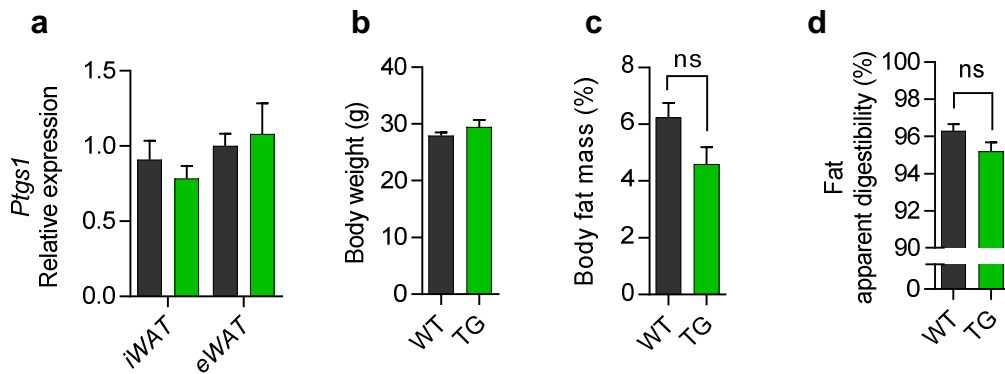

**Figure S1, Overexpression of COX-2 in mature adipocytes leads to a marginally lower body weight gain in response to high fat feeding.** a-c present results from experiment 1. (a) Adipose tissue *Ptgs1* mRNA expression in mice after 18 weeks on the HFD. (b) Body weight and (c) body fat mass of mice on fed the chow diet at 10 weeks of age after 2 weeks at 30°C before commencement of the HFD feeding. (d) Apparent digestibility of fat in feed after 2 weeks of HFD in single housed mice (n = 7).

**Figure S2.**

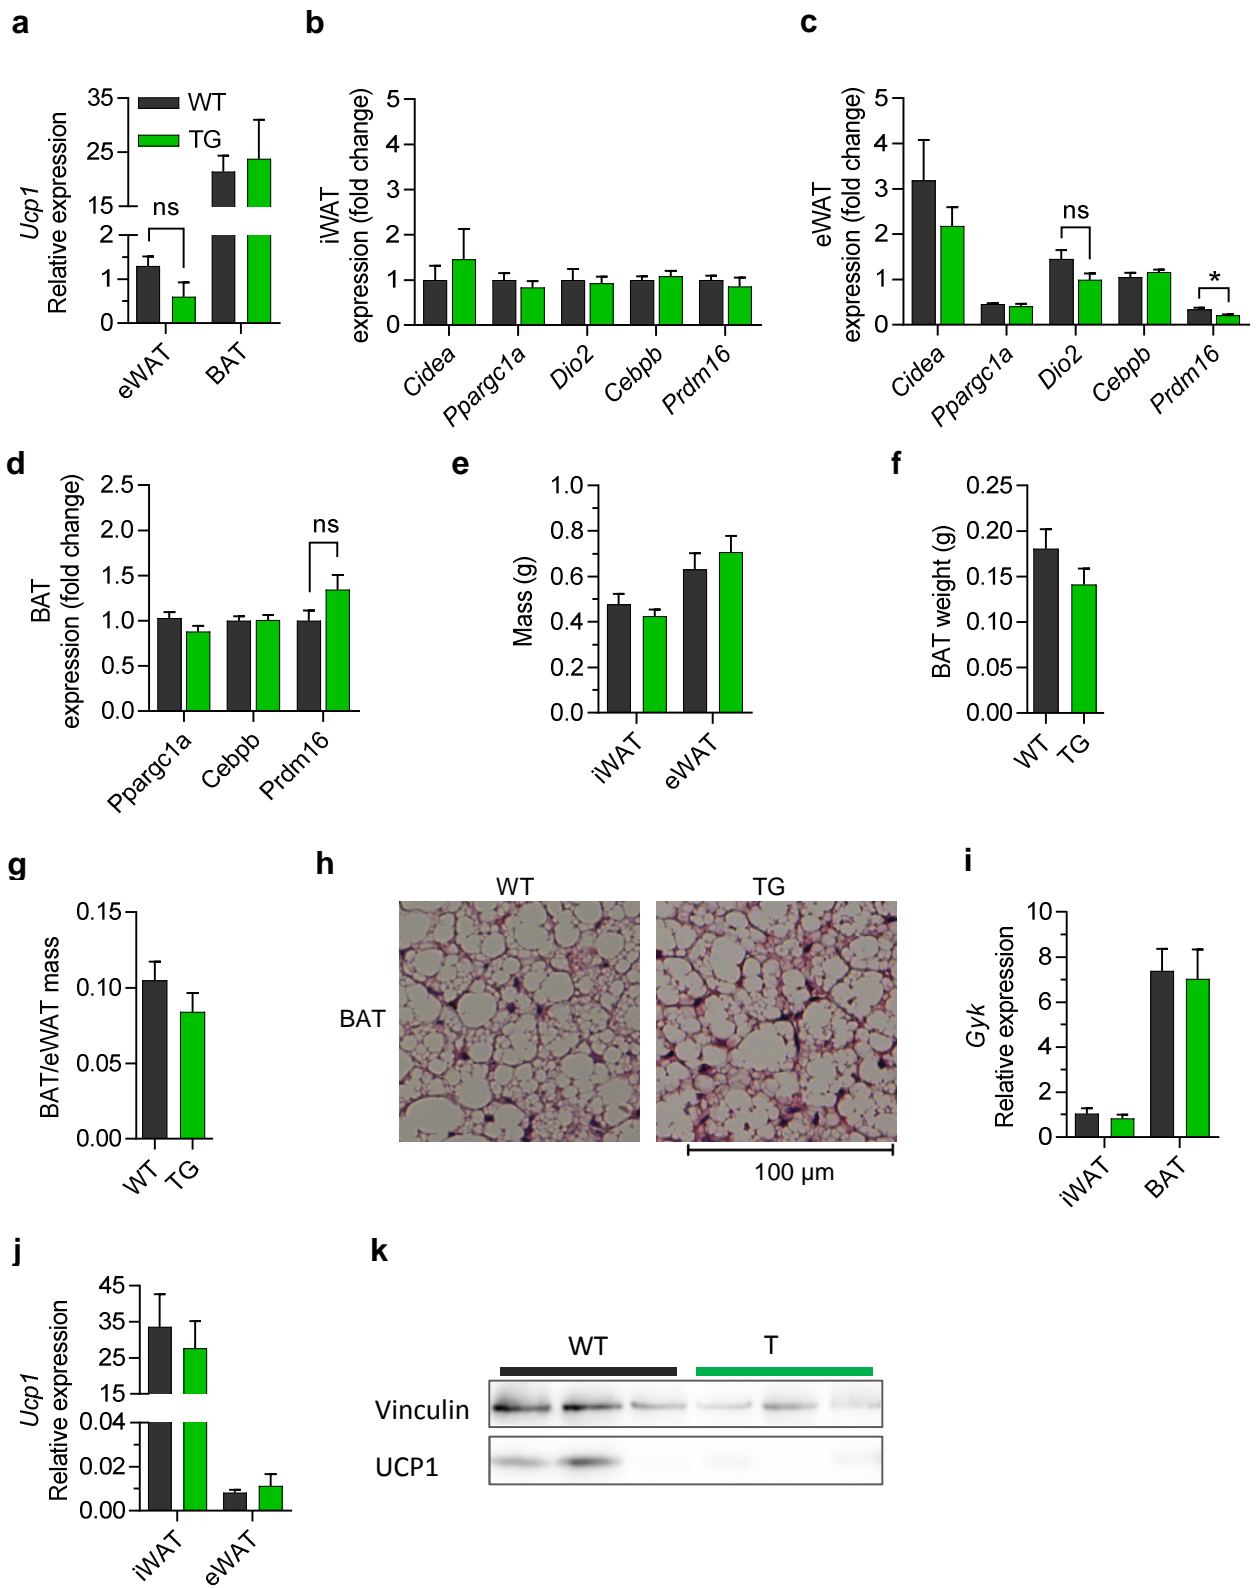

Legend on next page

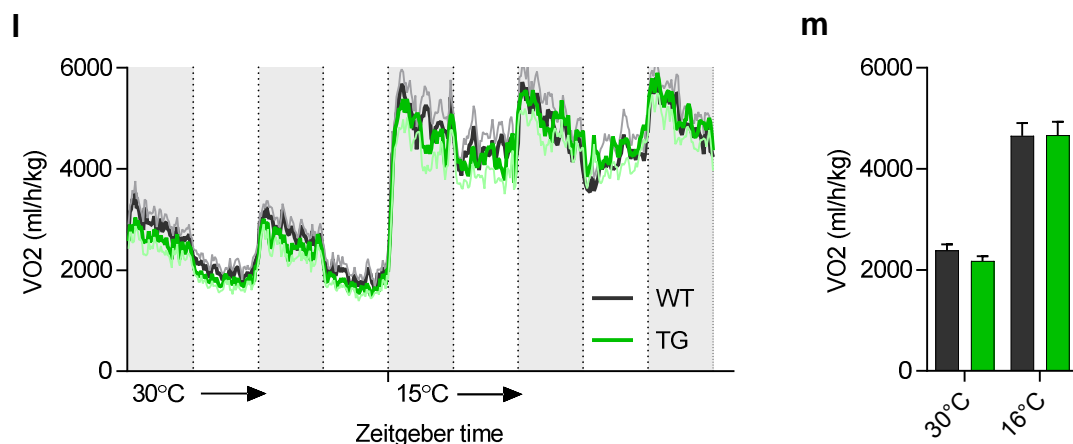

**Figure S2. Overexpression of COX-2 in mature adipocytes does not induce expression of *Ucp1* but still reduces iWAT mass and alters adipocyte size.** a-d and f-i present results from experiment 1 after 18 weeks on HFD. (a) *Ucp1* mRNA in eWAT and BAT (interscapular brown adipose tissue) in HFD mice at thermoneutrality. (b) *Cidea*, *Pparg1a*, *Dio2*, *Cebpb* and *Prdm16* mRNA in iWAT and (c) in eWAT. (d) *Pparg1a*, *Dio2*, *Cebpb* and *Prdm16* mRNA in BAT. (e) iWAT and eWAT mass after three weeks on HFD (experiment 2) (n=10). (f) Mass of BAT after 18 weeks on HFD (experiment 1). (g) Relative mass of BAT compared to eWAT. (h) Representative H&E sections of BAT. (i) *Gyk* mRNA in iWAT and BAT. (j) *Ucp1* mRNA in iWAT and BAT (experiment 3) after one week of cold exposure in HFD mice (n=7). (k) Western Blot of iWAT after one week of cold exposure (experiment 3). (l) Oxygen consumption rate (VO<sub>2</sub>) in ml/h/kg at 30°C and 15°C in single caged (experiment 4) after 4 weeks on the HFD (n = 8). (m) Average VO<sub>2</sub> at 30°C and 15°C from l. Students t-test, ns represents nonsignificant. Mean ± SEM.

Figure S3.

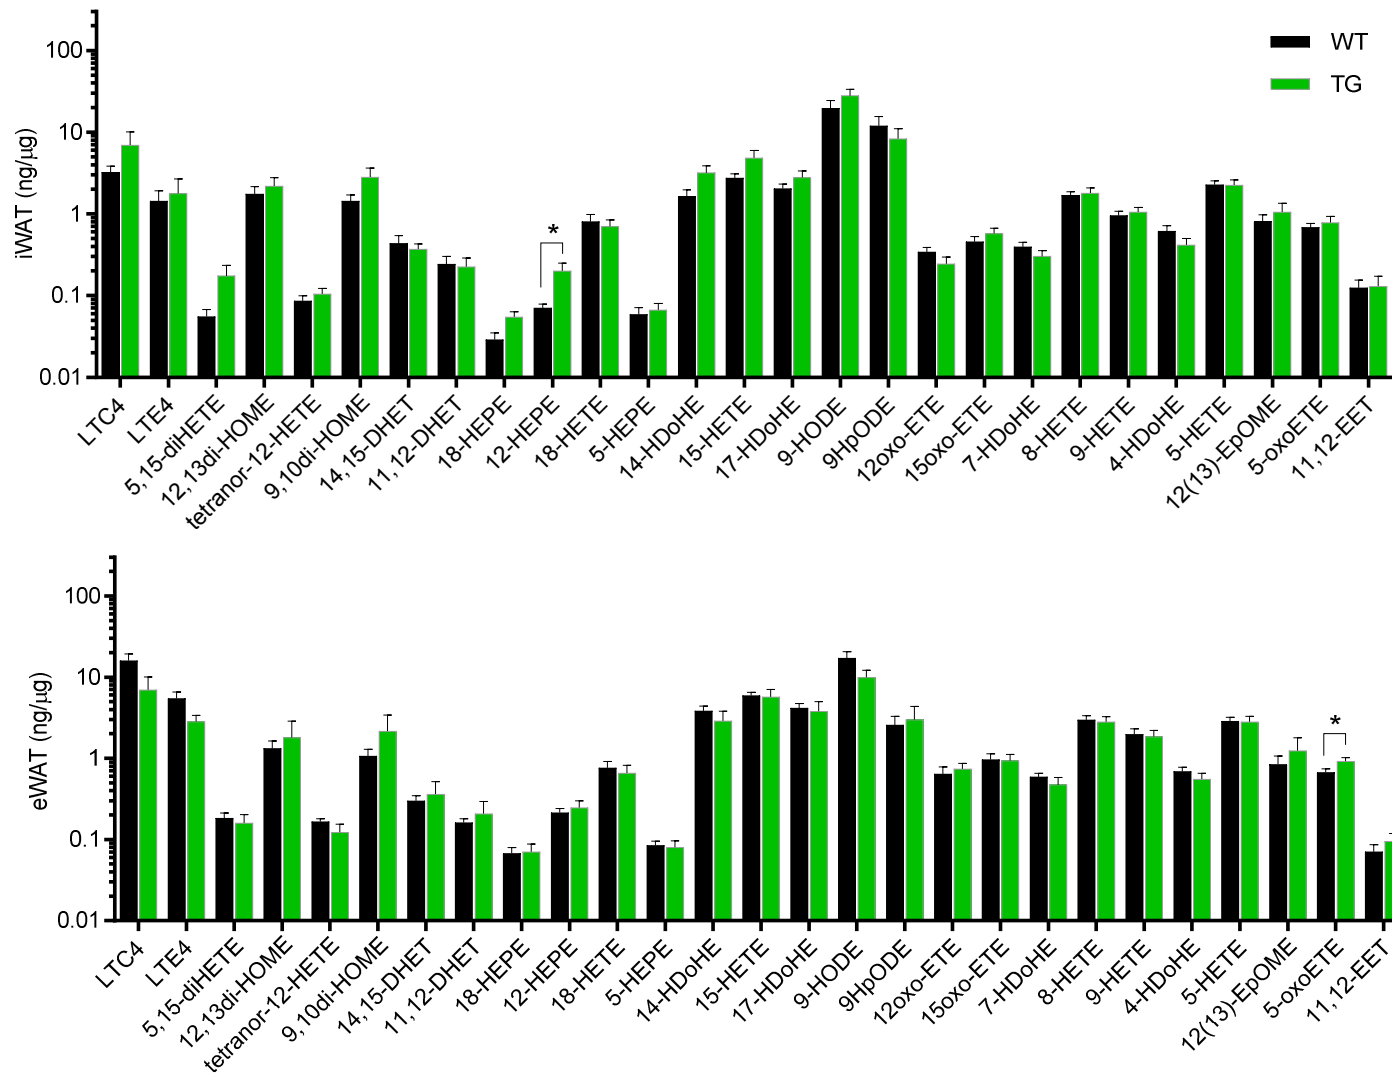

**Figure S3. Eicosanoids produced by COX-2 in iWAT and eWAT are selectively increased in TG mice.** Concentration of indicated eicosanoids in iWAT and eWAT after 18 weeks of HFD in mice (experiment 1). Mann-Whitney U test for differences between groups with adjustment for false-discovery rate. \* represents  $P \leq 0.05$ .

**Figure S4**

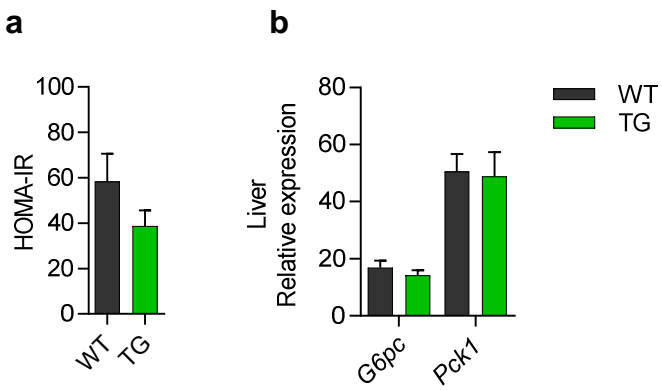

**Figure S4. Overexpression of COX-2 in mature adipocytes modestly affects insulin-stimulated glucose disposal. (a)** Homeostatic model assessment-insulin resistance (HOMA-IR) at time of GTT at week 15 on HFD. **(b)** Expression of *G6pc* and *Pck1* mRNA in liver. All data from experiment 1. Students t-test, ns represents nonsignificant. Mean  $\pm$  SEM.

**Figure S5**

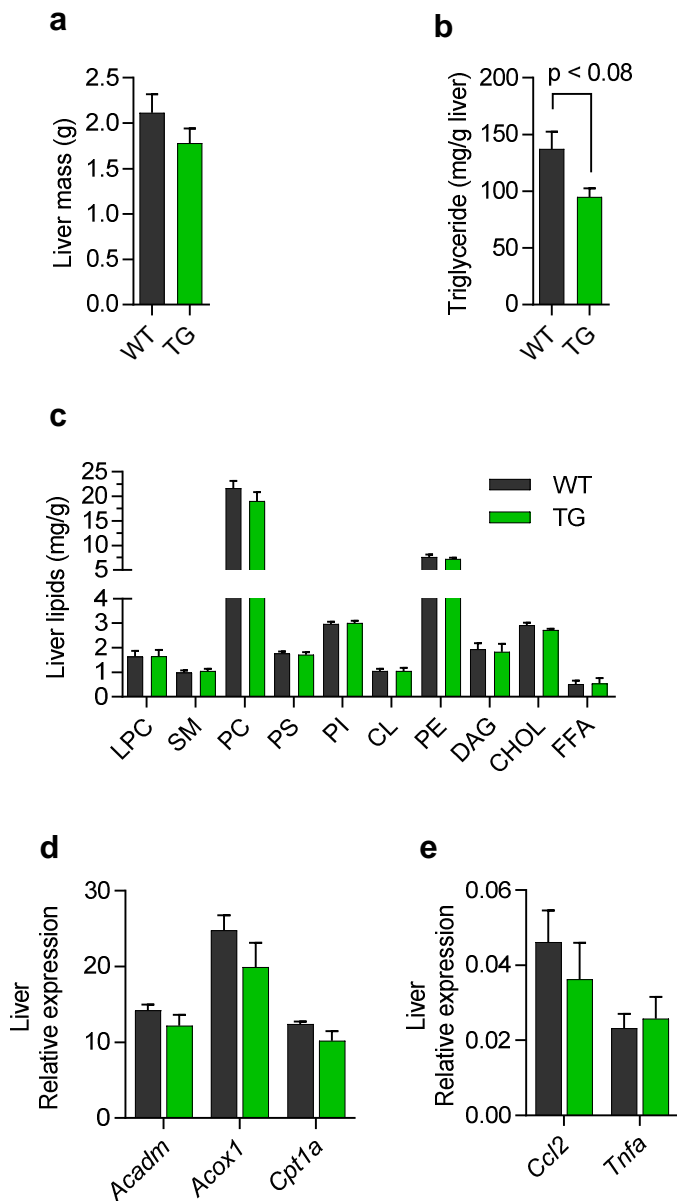

**Figure S5. Hepatic fat content and hepatocellular ballooning were decreased by COX-2 overexpression in mature adipocytes.** (a) Liver mass in gram. (b) Total triglyceride in mg/g liver. (c) Other liver lipids in mg/g liver LPC: Lysophosphatidylcholine, SM: Sphingomyelin, PC: Phosphatidylcholine, PS: Phosphatidylserine, PI: Phosphatidylinositol, CL: Cardiolipin, PE: Phosphatidylethanolamine, DAG: Diacylglycerol, CHOL: Cholesterol, FFA: Free fatty acid. (d) *Acadm*, *Acox1* and *Cpt1a* mRNA in liver. (e) *Ccl2* and *Tnfa* mRNA in liver. All data from experiment 1. Students t-test. Mean  $\pm$  SEM.

**Figure S6**

**a**

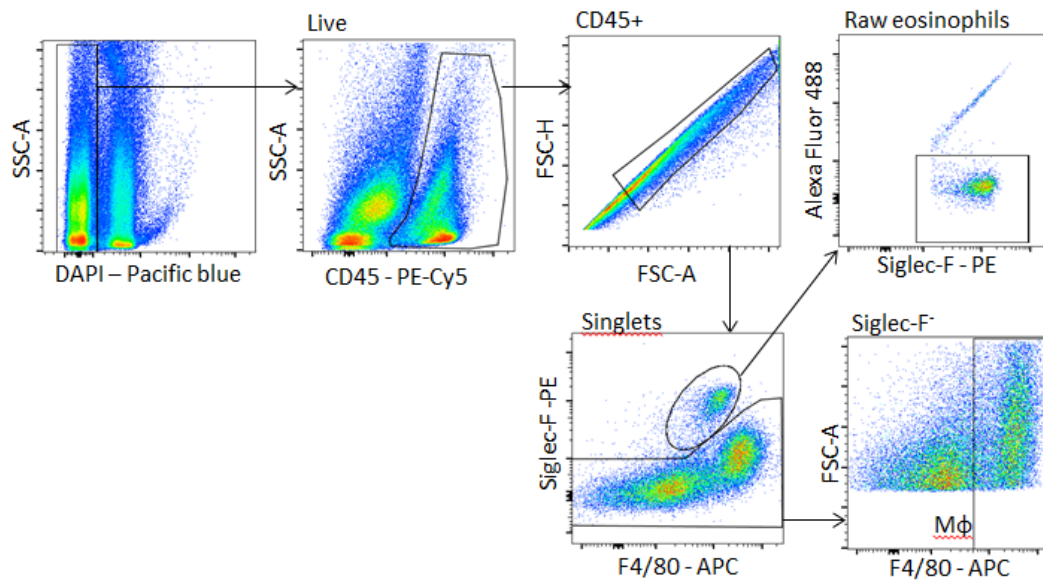

**b**

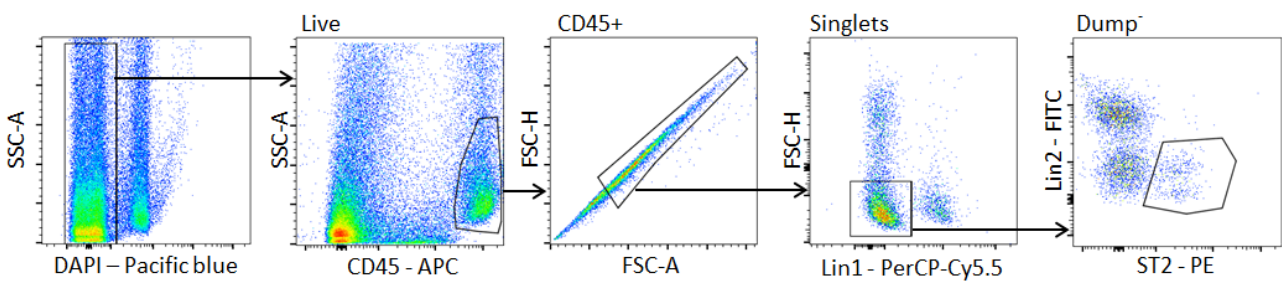

**Figure S6. Gating strategy for immune cells in iWAT and eWAT. (a)** Representative gating strategy for eosinophils and macrophages, and **(b)** for ILC2 cells. Lineage cocktail 1 (Lin1): FcεR1, CD19, lineage cocktail 2 (Lin2): CD4, CD8α, CD11b, CD49b, F4/80, NK1.1.



**Figure S7**

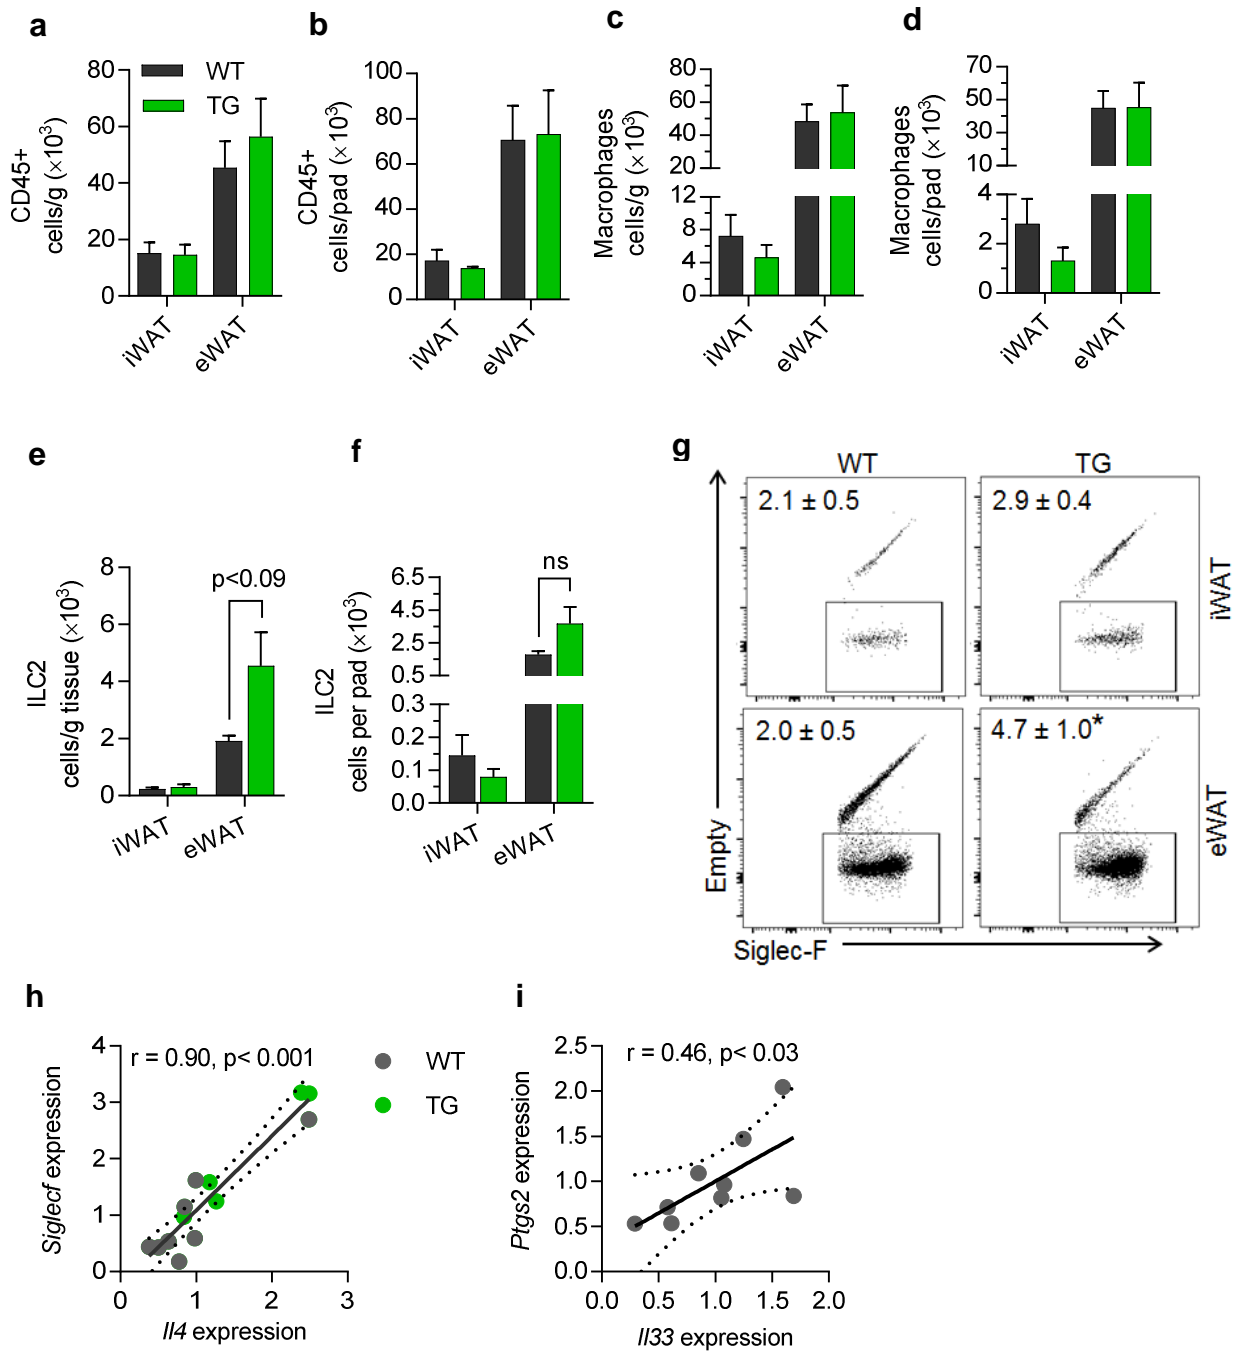

**Figure S7. Increased number of eosinophils in eWAT and increased expression of type 2 immune markers in iWAT in TG mice. (a)** CD45<sup>+</sup> cells per gram, and **(b)** per fat depot of iWAT and eWAT. **(c)** Macrophages per gram, and **(d)** per depot of iWAT and eWAT. **(e)** ILC2 cells per gram, and **(f)** per fat depot. **(g)** Abundance of eosinophils in per cent in SVF of iWAT and eWAT. **(h)** Correlation between *Il4* and *Siglecf* and **(i)** *Il33* and *Ptgs2* mRNA expression in iWAT. All data from experiment 1 after 18 weeks of HFD. Students t-test, ns represents nonsignificant. Mean  $\pm$  SEM.

## SUPPLEMENTAL PROCEDURES

**Apparent digestibility of fat.** Total lipid was extracted from feces and quantified in samples collected from a total of 5 days following 2 weeks of adaptation to HFD in a separate group of single-housed mice. Total feces was collected and frozen at  $-20^{\circ}\text{C}$  until analysis. Samples were weighed and 7 ml n-heptane was added to 0.7 g of feces followed by homogenization, centrifugation, evaporation and registration of free fatty acids. HCl and n-heptane was added to the remaining solid phase and the samples were heated at  $90^{\circ}\text{C}$  for 2 hours. After cooling, samples were spun down and the organic phase was transferred to a new tube. Hydromatrix and sample slurry was added to a liquid-liquid extraction column. After 5 min of incubation lipids were eluted using petroleum ether in a Büchi syncore evaporation unit. Samples were subsequently heated to  $103^{\circ}\text{C}$  for 30 min and dried in a desiccator before being weighing remaining fat. Total fat was calculated by adding free fatty acids and remaining fat after desiccation.

**Table S1. Lipid mediator standards used for quantification of lipid mediators.**

| <b>Abbreviation</b>         | <b>Full name/Synonym</b>                   | <b>Systematic name</b>                                                                                                         |
|-----------------------------|--------------------------------------------|--------------------------------------------------------------------------------------------------------------------------------|
| 6-keto-PGF1 $\alpha$ -d4    | 6-keto-PGF1 $\alpha$ -d4                   | 6-oxo-9 $\alpha$ ,11 $\alpha$ ,15S-trihydroxy-prost-13E-en-1-oic-3,3,4,4-d4 acid                                               |
| RVE1-d4                     | Resolvin E1-d4                             | 5S,12R,18R-trihydroxy-6Z,8E,10E,14Z,16E-eicosapentaenoic-6,7,14,15-d4 acid                                                     |
| TXB2-d4                     | Thromboxane B2-d4                          | 9 $\alpha$ ,11,15S-trihydroxy-thromba-5Z,13E-dien-1-oic-3,3,4,4-d4 acid                                                        |
| iPF2a-d11                   | 5-iPF2 $\alpha$ -VI-d11                    | ( $\pm$ )5,9 $\alpha$ ,11 $\alpha$ -trihydroxy-(8 $\beta$ )-prosta-6E,14Z-dien-1-oic-16,16,17,17,18,18,19,19,20,20,20-d11 acid |
| PGF2a-d4                    | Prostaglandin F2a-d4                       | 9 $\alpha$ ,11 $\alpha$ ,15S-trihydroxy-(8 $\beta$ )-prosta-5Z,13E-dien-1-oic-3,3,4,4-d4 acid                                  |
| PGE-2-d4                    | Prostaglandin E2-d4                        | 9-oxo-11 $\alpha$ ,15S-dihydroxy-prosta-5Z,13E-dien-1-oic-3,3,4,4-d4 acid                                                      |
| PGD2-d4                     | Prostaglandin D2-d4                        | 9 $\alpha$ ,15S-dihydroxy-11-oxo-prosta-5Z,13E-dien-1-oic-3,3,4,4-d4 acid                                                      |
| 13,14-diOH-15-keto-PGE2-d4  | 13,14-dihydro-15-keto Prostaglandin E2-d4  | 9,15-dioxo-11 $\alpha$ -hydroxy-prost-5Z-en-1-oic-3,3,4,4-d4 acid                                                              |
| 13,14-diOH-15-keto-PGF2a-d4 | 13,14-dihydro-15-keto Prostaglandin F2a-d4 | 9 $\alpha$ ,11 $\alpha$ -dihydroxy-15-oxo-prost-5Z-en-1-oic-3,3,4,4-d4 acid                                                    |
| 13,14-diOH-15-keto-PGD2-d4  | 13,14-dihydro-15-keto Prostaglandin D2-d4  | 9 $\alpha$ -hydroxy-11,15-dioxo-prost-5Z-en-1-oic-3,3,4,4-d4 acid                                                              |
| LTC4-d5                     | Leukotriene C4-d5                          | 5S-hydroxy-6R-(S-glutathionyl)-7E,9E,11Z,14Z-d5-eicosatetraenoic acid                                                          |
| LTE4-d5                     | Leukotriene E4-d5                          | 5S-hydroxy-6R-(S-cysteinyl)-7E,9E,11Z,14Z-eicosatetraenoic-19,19,20,20,20-d5 acid                                              |
| PGB2-d4                     | Prostaglandin B2-d4                        | 9-oxo-15S-hydroxy-prosta-5Z,8(12),13E-trien-1-oic-3,3,4,4-d4 acid                                                              |
| LTB4-d4                     | Leukotriene B4-d4                          | 5S,12R-dihydroxy-6Z,8E,10E,14Z-eicosatetraenoic-6,7,14,15-d4 acid                                                              |
| 12,13-di-HOME-d4            | ( $\pm$ )12(13)-DiHOME-d4                  | ( $\pm$ )12,13-dihydroxy-9Z-octadecenoic-9,10,12,13-d4 acid                                                                    |
| 9,10-di-HOME-d4             | 9,10-diHOME-(d4)                           | 9,10-dihydroxy-12Z-octadecenoic acid-(d4)                                                                                      |
| 15-deoxi-12,14-PGJ2-d4      | 15-deoxy- $\Delta$ 12,14-PGJ2-d4           | 11-oxo-prosta-5Z,9,12E,14E-tetraen-1-oic-3,3,4,4-d4 acid                                                                       |
| 20-HETE-d6                  | 20-hydroxy Arachidonic Acid-d6             | 20-hydroxy-5Z,8Z,11Z,14Z-eicosatetraenoic-16,16,17,17,18,18-d6 acid                                                            |
| 13-HODE-d4                  | 13(S)-HODE-d4                              | 13S-hydroxy-9Z,11E-octadecadienoic-9,10,12,13-d4 acid                                                                          |
| 15-HETE-d8                  | 15(S)-HETE-d8                              | 15(S)-hydroxy-5Z,8Z,11Z,13E-eicosatetraenoic-5,6,8,9,11,12,14,15-d8 acid                                                       |
| 9-HODE-d4                   | 9(S)-HODE-d4                               | 9S-hydroxy-10E,12Z-octadecadienoic-9,10,12,13-d4 acid                                                                          |
| 12-HETE-d8                  | 12(S)-HETE-d8                              | 12S-hydroxy-5Z,8Z,10E,14Z-eicosatetraenoic-5,6,8,9,11,12,14,15-d8 acid                                                         |
| 5-HETE-d8                   | 5(S)-HETE-d8                               | 5S-hydroxy-6E,8Z,11Z,14Z-eicosatetraenoic-5,6,8,9,11,12,14,15-d8 acid                                                          |
| 14,15-EET-d11               | ( $\pm$ )11(12)-EET-d11                    | ( $\pm$ )11(12)-epoxy-5Z,8Z,14Z-eicosatrienoic-16,16,17,17,18,18,19,19,20,20,20 acid                                           |
| 5-oxo-ETE-d7                | 5-OxoETE-d7                                | 5-oxo-6E,8Z,11Z,14Z-eicosatetraenoic-6,8,9,11,12,14,15-d7 acid                                                                 |
| 11,12-EET-d11               | ( $\pm$ )11(12)-EET-d11                    | ( $\pm$ )11(12)-epoxy-5Z,8Z,14Z-eicosatrienoic-16,16,17,17,18,18,19,19,20,20,20 acid                                           |
| 8,9-EET-d11                 | ( $\pm$ )8(9)-EET-d11                      | ( $\pm$ )8(9)-epoxy-5Z,8Z,14Z-eicosatrienoic-16,16,17,17,18,18,19,19,20,20,20 acid                                             |

**Table S1 continued**

|             |                          |                                                                                   |
|-------------|--------------------------|-----------------------------------------------------------------------------------|
| 5,6-EET-d11 | (±)5(6)-EET-d11          | (±)5(6)-epoxy-8Z,11Z,14Z-eicosatrienoic-16,16,17,17,18,18,19,19,20,20,20-d11 acid |
| EPA-d5      | Eicosapentaenoic Acid-d5 | 5Z,8Z,11Z,14Z,17Z-eicosapentaenoic-19,19,20,20,20-d5 acid                         |
| DHA-d5      | Docosahexaenoic Acid-d5  | 4Z,7Z,10Z,13Z,16Z,19Z-docosahexaenoic-21,21,22,22,22-d5 acid                      |
| AA-d8       | Arachidonic Acid-d8      | 5Z,8Z,11Z,14Z-eicosatetraenoic-5,6,8,9,11,12,14,15-d8 acid                        |

**Table S2. Lipid mediators measured in the study.**

| Abbreviation                | Full name/Synonym                              | Systematic name                                                    |
|-----------------------------|------------------------------------------------|--------------------------------------------------------------------|
| PGF <sub>1α</sub>           | Prostaglandin F1α                              | 9S,11R,15S-trihydroxy-13E-prostaenoic acid                         |
| 6-keto-PGF <sub>1α</sub>    | 6-keto-Prostaglandin F1α                       | 6-oxo-9S,11R,15S-trihydroxy-13E-prostenoic acid                    |
| 6,15dkdh-PGF <sub>1α</sub>  | 6,15-diketo-13,14-dihydro-PGF1a                | 6,15-dioxo-9S,11R-dihydroxyprostanoic acid                         |
| PGF <sub>2α</sub>           | Prostaglandin F2α                              | 9S,11R,15S-trihydroxy-5Z,13E-prostadienoic acid                    |
| 5-iso-PGF <sub>2α</sub> -VI | Isoprostane F2α-I                              | 5,9S,11R-trihydroxy-6E,14Z-prostadienoic acid-cyclo[8S,12R]        |
| PGE <sub>2</sub>            | Prostaglandin E2                               | 9-oxo-11R,15S-dihydroxy-5Z,13E-prostadienoic acid                  |
| PGD <sub>2</sub>            | Prostaglandin D2                               | 9S,15S-dihydroxy-11-oxo-5Z,13E-prostadienoic acid                  |
| TXB <sub>2</sub>            | Thromboxane B2                                 | 9S,11,15S-trihydroxy-thromboxa-5Z,13E-dien-1-oic acid              |
| 12-HHT                      | 12S-HHTrE                                      | 12S-hydroxy-5Z,8E,10E-heptadecatrienoic acid                       |
| 11-HETE                     | 11-HETE                                        | 11-hydroxy-5Z,8Z,11E,14Z-eicosatetraenoic acid                     |
| 12-HETE                     | 12-HETE                                        | 12-hydroxy-5Z,8Z,10E,14Z-eicosatetraenoic acid                     |
| 13-HODE                     | 13S-HODE                                       | 13S-hydroxy-9Z,11E-octadecadienoic acid                            |
| LTC <sub>4</sub>            | Leukotriene C4                                 | 5S-hydroxy,6R-(S-glutathionyl),7E,9E,11Z,14Z-eicosatetraenoic acid |
| LTE <sub>4</sub>            | Leukotriene E4                                 | 5S-hydroxy,6R-(S-cysteinyl),7E,9E,11Z,14Z-eicosatetraenoic acid    |
| 5,15-diHETE                 | 5,15-diHETE                                    | (5Z,9E,11Z,13E)-8,15-dihydroxyicosa-5,9,11,13-tetraenoic acid      |
| 12,13di-HOME                | 12,13-DiHOME                                   | 12,13-dihydroxy-9Z-octadecenoic acid                               |
| tetranor-12-HETE            | Tetranor-12R-HETE                              | 8R-hydroxy-4Z,6E,10Z-hexadecatrienoic acid                         |
| 9,10di-HOME                 | Leukotoxin diol                                | 9,10-dihydroxy-12Z-octadecenoic acid                               |
| 14,15-DHET                  | 14,15-DiHETE                                   | (+/-)-14,15-dihydroxy-5Z,8Z,11Z,17Z-eicosatetraenoic acid          |
| 11,12-DHET                  | 11,12-DiHETE                                   | (+/-)-11,12-dihydroxy-5Z,8Z,14Z,17Z-eicosatetraenoic acid          |
| 18-HEPE                     | (+/-)-18-HEPE                                  | (+/-)-18-hydroxy-5Z,8Z,11Z,14Z,16E-eicosapentaenoic acid           |
| 12-HEPE                     | (+/-)-12-HEPE                                  | (+/-)-12-hydroxy-5Z,8Z,10E,14Z,17Z-eicosapentaenoic acid           |
| 18-HETE                     | 18-HETE                                        | 18-hydroxy-5Z,8Z,11Z,14Z-eicosatetraenoic acid                     |
| 5-HEPE                      | (+/-)-5-HEPE                                   | (+/-)-5-hydroxy-6E,8Z,11Z,14Z,17Z-eicosapentaenoic acid            |
| 14-HDoHE                    | (+/-)-14-HDoHE                                 | (+/-)-14-hydroxy-4Z,7Z,10Z,12E,16Z,19Z-docosahexaenoic acid        |
| 15-HETE                     | 15-HETE                                        | 15-hydroxy-5Z,8Z,11Z,13E-eicosatetraenoic acid                     |
| 17-HDoHE                    | (+/-)-17-HDoHE                                 | (+/-)-17-hydroxy-4Z,7Z,10Z,13Z,15E,19Z-docosahexaenoic acid        |
| 9-HODE                      | 9-hydroxy-trans-10,cis-12-octadecadienoic acid | 9-hydroxy-10E,12Z-octadecadienoic acid                             |
| 9HpODE                      | 9S-HpODE                                       | 9S-hydroperoxy-10E,12Z-octadecadienoic acid                        |
| 12oxo-ETE                   | 12-oxo-ETE                                     | 12-oxo-5Z,8Z,10E,14Z-eicosatetraenoic acid                         |
| 15oxo-ETE                   | 15-Oxo-ETE                                     | 15-oxo-5Z,8Z,11Z,13E-eicosatetraenoic acid                         |
| 7-HDoHE                     | (+/-)-17-HDoHE                                 | (+/-)-17-hydroxy-4Z,7Z,10Z,13Z,15E,19Z-docosahexaenoic acid        |
| 8-HETE                      | 8-HETE                                         | 8-hydroxy-5Z,9E,11Z,14Z-eicosatetraenoic acid                      |

**Table S2 continued**

|              |                   |                                                             |
|--------------|-------------------|-------------------------------------------------------------|
| 9-HETE       | 9-HETE            | 9-hydroxy-5Z,7E,11Z,14Z-eicosatetraenoic acid               |
| 4-HDoHE      | (+/-)-14-HDoHE    | (+/-)-14-hydroxy-4Z,7Z,10Z,12E,16Z,19Z-docosahexaenoic acid |
| 5-HETE       | 5-HETE            | 5-hydroxy-6E,8Z,11Z,14Z-eicosatetraenoic acid               |
| 12(13)-EpOME | Vernolic acid     | (+/-)-12(13)-epoxy-9Z-octadecenoic acid                     |
| 5oxo-ETE     | 5-Oxo-ETE         | 5-oxo-6E,8Z,11Z,14Z-eicosatetraenoic acid                   |
| 11,12-EET    | (+/-)11,12-EpETrE | 11,12-epoxy-5Z,8Z,14Z-eicosatrienoic acid                   |

**Table S3. Lipid mediators below the detection limit.**

| <b>Abbreviation</b> | <b>Synonym</b>              | <b>Systematic name</b>                                                   |
|---------------------|-----------------------------|--------------------------------------------------------------------------|
| 20cooh-LTB4         | 20-carboxy LTB <sub>4</sub> | 5S,12R-dihydroxy-6Z,8E,10E,14Z-eicosatetraene-1,20-dioic acid            |
| RvE1                | Resolvin E1                 | 5S,12R,18R-trihydroxy-6Z,8E,10E,14Z,16E-eicosapentaenoic acid            |
| 20-oh-LTB4          | 20-Hydroxy-leukotriene B4   | (5S,6Z,8E,10E,12R,14Z)-5,12,20-trihydroxyicosa-6,8,10,14-tetraenoic acid |
| TXB3                | Thromboxane B3              | 9S,11,15S-trihydroxy-thromboxa-5Z,13E,17Z-trien-1-oic acid               |
| PGF3 $\alpha$       | Prostaglandin F3 $\alpha$   | 9S,11R,15S-trihydroxy-5Z,13E,17Z-prostatrienoic acid                     |
| PGF2 $\beta$        | Prostaglandin F2 $\beta$    | 9R,11R,15S-trihydroxy-5Z,13E-prostadienoic acid                          |
| LXA5                | Lipoxin A5                  | 5S,6R,15S-trihydroxy-7E,9E,11Z,13E,17Z-eicosapentaenoic acid             |
| PGE3                | Prostaglandin E3            | 9-oxo-11R,15S-dihydroxy-5Z,13E,17Z-prostatrienoic acid                   |
| PGD3                | Prostaglandin D3            | 9S,15S-dihydroxy-11-oxo-5Z,13E,17Z-prostatrienoic acid                   |
| LTD4                | Leukotriene D4              | 5S-hydroxy-6R-(S-cysteinylglyciny)-7E,9E,11E,14Z-eicosatetraenoic acid   |
| RvD2                | Resolvin D2                 | 7S,16R,17R-trihydroxy-4Z,8E,10Z,12E,14E,19Z-docosahexaenoic acid         |
| 14,15-LTC4          | 14,15-Leukotriene C4        | 15S-hydroxy,14R-(S-glutathionyl)-5Z,8Z,10E,12E-eicosatetraenoic acid     |
| LXA4                | Lipoxin A4                  | 5S,6R,15S-trihydroxy-7E,9E,11Z,13E-eicosatetraenoic acid                 |
| RvD1                | Resolvin D1                 | 7S,8R,17S-trihydroxy-4Z,9E,11E,13Z,15E,19Z-docosahexaenoic acid          |
| PGA2                | Prostaglandin A2            | 9-oxo-15S-hydroxy-5Z,10Z,13E-prostatrienoic acid                         |
| 8,15-DiHETE         | 8,15-DiHETE                 | (5Z,9E,11Z,13E)-8,15-dihydroxyicosa-5,9,11,13-tetraenoic acid            |
| NPD1                | Neuroprotectin D1           | 10R,17S-dihydroxy-4Z,7Z,11E,13E,15Z,19Z-docosahexaenoic acid             |
| LTB4                | Leukotriene B4              | 5S,12R-dihydroxy-6Z,8E,10E,14Z-eicosatetraenoic acid                     |
| 11,12-DHET          | ( $\pm$ )11,12-DiHETrE      | ( $\pm$ )11,12-dihydroxy-5Z,8Z,14Z-eicosatrienoic acid                   |
| 9-HEPE              | (+/-)-9-HEPE                | (+/-)-9-hydroxy-5Z,7E,11Z,14Z,17Z-eicosapentaenoic acid                  |
| 11-HEPE             | (+/-)-11-HEPE               | (+/-)-11-hydroxy-5Z,8Z,12E,14Z,17Z-eicosapentaenoic acid                 |
| 20-HETE             | 20-hydroxy Arachidonic Acid | 20-hydroxy-5Z,8Z,11Z,14Z-eicosatetraenoic acid                           |
| 13-OxoODE           | 13-OxoODE                   | 13-oxo-9,11-octadecadienoic acid                                         |
| 10-HDoHE            | (+/-)-10-HDoHE              | (+/-)-10-hydroxy-4Z,7Z,11E,13Z,16Z,19Z-docosahexaenoic acid              |
| 17-keto-DPA         | 17-oxo-DPA                  | 7Z,10Z,13Z,15E,19Z-17-keto-docosapentaenoic acid                         |

**Table S4. Primers used in the study.**

| <b>Gene</b>     | <b>Forward primer, 5'-</b> | <b>Reverse primer, 5'-</b> |
|-----------------|----------------------------|----------------------------|
| <i>Acadm</i>    | AGTATGCCCTGGATAGGAAGACAT   | CTTGGTGCTCCACTAGCAGCT      |
| <i>Acox1</i>    | GGGTCATGGAACTCATCTTCGA     | GAATGAACTCTTGGGTCTTGGG     |
| <i>Adipoq</i>   | GATGGCAGAGATGGCACTCC       | CTTGCCAGTGCTGCCGTCAT       |
| <i>Arg1</i>     | GTCATTTGGGTGGATGCTCAC      | TCCTGGTACATCTGGGAACTTTC    |
| <i>Ccl2</i>     | GTGTTGGCTCAGCCAGATGC       | GCTTGGTGACAAAACTACAGC      |
| <i>Cebpa</i>    | CAAGAACAGCAACGAGTACCG      | GTCCTGGTCAACTCCAGCAC       |
| <i>Cebpb</i>    | GGGTTTCGGGACTTGATGC        | ACATCAACAACCCCGCAGG        |
| <i>CIDEA</i>    | GACAGAAATGGACACCGGG        | GATTCCTTAACACGGCC          |
| <i>Cpt1a</i>    | TACTGCTGTATCGTCGCACG       | GACGAATAGGTTTGAGTTCCTCAC   |
| <i>Dio2</i>     | CAGTGTGGTGCACGTCTCCAATC    | TGAACCAAAGTTGACCACCAG      |
| <i>Fabp4</i>    | TGGAAGCTTGTCTCCAGTGA       | AATCCCCATTTACGCTGATG       |
| <i>Fizz1</i>    | CCATAGAGATTATCGTGGAG       | TGGTCCTGTCAACGAGTAAG       |
| <i>G6pc</i>     | ACCGGACCAGGAAGTCCC         | GCAATGCCTGACAAGACTCC       |
| <i>Gyk</i>      | CAAATGCAAGCAGGACGATG       | GGCCCCAGCTTTCATTAGG        |
| <i>Il13</i>     | CAGCCTCCCCGATACCAAAT       | GCGAAACAGTTGCTTTGTGTAG     |
| <i>Il33</i>     | CCTGCCTCCCTGAGTACATACA     | CTTCTTCCCATCCACACCGT       |
| <i>Il4</i>      | GGTCTCAACCCCGAGCTAGT       | GCCGATGATCTCTCTCAAGTGAT    |
| <i>Il5</i>      | TCAGGGGCTAGACATACTGAAG     | CCAAGGAACTCTTGCAGGTAAT     |
| <i>Klf5</i>     | GCTGGTCCAGACAAGATGTG       | GGAAGACGTTTATGTTGATGC      |
| <i>Nos2</i>     | CTACGCCTTCAACACCAAGG       | CAAACAAGCATACTGAAGG        |
| <i>Pck1</i>     | GTGCCTGTGGGAAGACTAAC       | CCTTAAGTTGCCTTGGGCAT       |
| <i>Pparg1</i>   | GTGTGACAGACAAGATTTGAAAG    | GCTTGATGTCAAAGGAATGCG      |
| <i>Pparg2</i>   | ACAGCAAATCTCTGTTTTATGC     | TGCTGGAGAAATCAACTGTGG      |
| <i>Ppargc1a</i> | CATTTGATGCACTGACAGATGGA    | CCGTCAGGCATGGAGGAA         |
| <i>Prdm16</i>   | CAGCACGGTGAAGCCATTC        | GCGTGCATCCGCTTGTG          |
| <i>Pref1</i>    | CGAAATAGACGTTTCGGGCTT      | TCGTAAGTGGCCTTTCTCCAG      |
| <i>Ptgs1</i>    | TTACTATCCGTGCCAGAACCA      | CCCGTGCGAGTACAATCACA       |
| <i>Ptgs2</i>    | GACTGGGCCATGGAGTGG         | CACCTCTCCACCAATGACC        |
| <i>Siglecf</i>  | CTGGCTACGGACGGTTATTTCG     | GGAATTGGGGTACTGGACTTG      |
| <i>Slc2a4</i>   | CAGAAGGTGATTGAACAGAGC      | CCCTGATGTTAGCCCTGAG        |
| <i>Tbp</i>      | ACCCTTCACCAATGACTCCTATG    | ATGATGACTGCAGCAAATCGC      |
| <i>Tnfa</i>     | CCCTCACACTCAGATCATCTTCT    | GCTACGACGTGGGCTACAG        |
| <i>Ucp1</i>     | AGCCGGCTTAATGACTGGAG       | TCTGTAGGCTGCCCAATGAAC      |
